# Supplementary material for: Maturation and abundance of tertiary lymphoid structures are associated with the efficacy of neoadjuvant chemoimmunotherapy in resectable non-small cell lung cancer
Source: PubMed Central journal article supplement — J Immunother Cancer. 2022 Nov 8;10(11):e005531. doi: 10.1136/jitc-2022-005531 (PMC9644367; doi:10.1136/jitc-2022-005531), 2022-11-08
Supplement: jitc-2022-005531supp001.pdf [file jitc-2022-005531supp001.pdf]

## 1 **Supplemental materials**

## 2 **Materials and Methods**

### 3 **Patients**

4 The inclusion criteria for treatment naïve cohort were operable lung cancer patients who underwent  
5 upfront surgery with pathology-confirmed stage II-IIIa NSCLC according to the eighth edition of the  
6 TNM classification for lung cancer. The inclusion criteria for chemoimmunotherapy and  
7 chemotherapy cohort were as follows: (1) patients with NSCLC (II-IIIa stage) confirmed by  
8 bronchoscopy biopsy or computed tomography (CT) guided puncture biopsy; (2) the preoperative  
9 staging done with contrast-enhanced computed tomography (CT) or positron emission tomography  
10 (PET); (3) neoadjuvant platinum-based chemotherapy combined with anti-PD-1 (Nivolumab,  
11 Camrelizumab, or Tislelizumab) or neoadjuvant platinum-based chemotherapy alone administered  
12 for at least 2 cycles before surgery; (4) formalin-fixed, paraffin-embedded (FFPE) surgical tumor  
13 tissue samples available. Chemotherapy regimens were selected according to the National  
14 Comprehensive Cancer Network (NCCN) guidelines. For non-squamous NSCLC, cisplatin or  
15 carboplatin plus Pemetrexed were administered; and for squamous NSCLC, cisplatin or carboplatin  
16 plus paclitaxel were administered. Cisplatin was preferred, and carboplatin used for the patients with  
17 comorbidities or not able to tolerate cisplatin. 121 cancer tissue samples were obtained during  
18 surgical resection. In the neoadjuvant chemoimmunotherapy group, 7 biopsies were collected by  
19 bronchoscopy or CT-guided percutaneous lung puncture within 3 weeks before neoadjuvant therapy.  
20 All samples were immediately formalin-fixed and paraffin-embedded (FFPE) after tissue collection.

### 21 **Multiplex immunohistochemistry (mIHC)**

22 Staining was conducted using the Akoya OPAL Polaris 7-Color Automation IHC kit  
23 (NEL871001KT). FFPE tissue slides were first deparaffinized in a BOND RX system (Leica

24 Biosystems) and then incubated sequentially with primary antibodies targeting CD163 (Abcam,  
 25 ab182422, 1:500), CD68 (Abcam, ab213363, 1:1000), PD-1 (CST, D4W2J, 1:200), PD-L1 (CST,  
 26 E1L3N, 1:400), CD3 (Dako, A0452, 1:1), CD4 (Abcam, ab133616, 1:100), CD8 (Abcam, ab178089,  
 27 1:200), CD56 (Abcam, ab75813, 1:1000), CD20 (Dako, L26, IR604, 1:1), FOXP3 (Abcam, ab20034,  
 28 1:100) and pan-CK ( Abcam, ab7753, 1:100). Nuclei were stained with DAPI. Multiplex stained  
 29 slides were scanned using a Vectra Polaris Quantitative Pathology Imaging System (Akoya  
 30 Biosciences) at 20 nm wavelength intervals from 440 nm to 780 nm with a fixed exposure time and  
 31 an absolute magnification of  $\times 200$ . All scans for each slide were then superimposed to obtain a  
 32 single image. Multilayer images were imported to inForm v.2.4.8 (Akoya Biosciences) for  
 33 quantitative image analysis. Tumor parenchyma and stroma were differentiated by Pan-CK staining.  
 34 The quantities of various cell populations were expressed as the number of stained cells per square  
 35 millimeter and the percentage of positively stained cells among all nucleated cells.

**Supplemental table 1. Treatment regimens for different treatment groups**

| Cohort                                | Histology          | Treatment options                                                                                                    | Patients number |
|---------------------------------------|--------------------|----------------------------------------------------------------------------------------------------------------------|-----------------|
| Neoadjuvant<br>chemoimmunother<br>apy | Non-squamous NSCLC | Nivolumab 360 mg + Cisplatin 75 mg/m <sup>2</sup> or<br>Carboplatin AUC 5 + Pemetrexed 500 mg/m <sup>2</sup>         | 10              |
|                                       |                    | Camrelizumab 200 mg + Cisplatin 75 mg/m <sup>2</sup> or<br>Carboplatin AUC 5 + Pemetrexed 500 mg/m <sup>2</sup>      | 3               |
|                                       |                    | Tislelizumab 200 mg + Cisplatin 75 mg/m <sup>2</sup> or<br>Carboplatin AUC 5 + Pemetrexed 500 mg/m <sup>2</sup>      | 6               |
|                                       | Squamous NSCLC     | Nivolumab 360 mg + Cisplatin 75 mg/m <sup>2</sup> or<br>Carboplatin AUC 5 + Paclitaxel-albumin 135 mg/m <sup>2</sup> | 12              |

|                          |                    |                                                                                                                      |    |
|--------------------------|--------------------|----------------------------------------------------------------------------------------------------------------------|----|
|                          |                    | Camrelizumab 200 mg + Cisplatin 75 mg/m <sup>2</sup> or Carboplatin AUC 5 + Paclitaxel-albumin 135 mg/m <sup>2</sup> | 3  |
|                          |                    | Tislelizumab 200 mg + Cisplatin 75 mg/m <sup>2</sup> or Carboplatin AUC 5 + Paclitaxel-albumin 135 mg/m <sup>2</sup> | 6  |
| Neoadjuvant chemotherapy | Non-squamous NSCLC | Cisplatin 75 mg/m <sup>2</sup> or Carboplatin AUC 5 + Pemetrexed 500 mg/m <sup>2</sup>                               | 16 |
|                          | Squamous NSCLC     | Cisplatin 75 mg/m <sup>2</sup> or Carboplatin AUC 5 + Paclitaxel-albumin 135 mg/m <sup>2</sup>                       | 25 |

**Supplemental table 2. Univariate analysis of MPR for neoadjuvant chemoimmunotherapy and neoadjuvant chemotherapy group**

| Characteristics | Neoadjuvant chemoimmunotherapy |     |         |                     | Neoadjuvant chemotherapy |     |                |                     |
|-----------------|--------------------------------|-----|---------|---------------------|--------------------------|-----|----------------|---------------------|
|                 | Non-MPR                        | MPR | P-value | Odds ratio (95% CI) | Non-MPR                  | MPR | P-value        | Odds ratio (95% CI) |
| Gender          | Male                           | 12  | 13      | 0.254               | 28                       | 4   | 0.797          | 1.034               |
|                 | Female                         | 10  | 5       | (0.573-8.190)       | 6                        | 3   | (0.102-10.527) |                     |
| Age             | < 63                           | 13  | 6       | 0.109               | 18                       | 5   | 0.377          | 2.222               |
|                 | ≥ 63                           | 9   | 12      | (0.095-1.267)       | 16                       | 2   | (0.377-13.082) |                     |
| Smoking history | Smoker or ex-smoker            | 15  | 15      | 0.278               | 27                       | 6   | 0.703          | 1.556               |
|                 |                                |     |         | (0.505-10.778)      |                          |     | (0.160-15.123) |                     |

|                                      |                          |    |    |                               |    |   |                               |
|--------------------------------------|--------------------------|----|----|-------------------------------|----|---|-------------------------------|
|                                      | Never smoker             | 7  | 3  |                               | 7  | 1 |                               |
| Histology                            |                          |    |    | 0.017                         |    |   | 0.512                         |
|                                      | Squamous cell carcinomas | 8  | 13 | 0.621 0.542<br>(0.048-6.144)  | 21 | 4 | 0.274 0.190<br>(0.010-3.716)  |
|                                      | Adenocarcinoma           | 13 | 2  | 0.032 0.051<br>(0.003-0.770)  | 12 | 2 | 0.265 0.167<br>(0.007-3.890)  |
|                                      | Large cell carcinoma     | 1  | 3  | 1                             | 1  | 1 | 1                             |
| N stage                              | N0                       | 14 | 15 | 0.174 2.857<br>(0.629-12.981) | 18 | 6 | 0.140 5.333<br>(0.578-49.181) |
|                                      | N1-2                     | 8  | 3  |                               | 16 | 1 |                               |
| Neoadjuvant therapy number of cycles | 2                        | 4  | 12 | 0.003 9.000<br>(2.088-38.787) | 24 | 1 | 0.020 0.069<br>(0.007-0.654)  |
|                                      | >2                       | 18 | 6  |                               | 10 | 6 |                               |
| TLS maturation                       | Low-maturation           | 9  | 1  | 0.027 0.085<br>(0.010-0.758)  | 27 | 1 | 0.007 0.043<br>(0.004-0.420)  |
|                                      | High-maturation          | 13 | 17 |                               | 7  | 6 |                               |

| TLS abundance |   | 0.058 |                              |    | 0.989 |                               |  |
|---------------|---|-------|------------------------------|----|-------|-------------------------------|--|
| Score 0       | 5 | 1     | 1                            | 20 | 0     | 1                             |  |
| Score 1       | 5 | 3     | 0.035 0.073<br>(0.006-0.829) | 8  | 0     | 0.998 -<br>-                  |  |
| Score 2       | 8 | 3     | 0.103 0.218<br>(0.035-1.364) | 2  | 3     | 0.999 -<br>-                  |  |
| Score 3       | 4 | 11    | 0.026 0.136<br>(0.024-0.786) | 4  | 4     | 0.725 1.500<br>(0.156-14.420) |  |

**Supplemental table 3. The correlation between TLS maturation and clinicopathological features**

| Characteristics | Neoadjuvant chemoimmunotherapy |                     |         | Neoadjuvant chemotherapy |                     |         | Treatment naïve    |                     |         |      |
|-----------------|--------------------------------|---------------------|---------|--------------------------|---------------------|---------|--------------------|---------------------|---------|------|
|                 | Low-maturation TLS             | High-maturation TLS | P-value | Low-maturation TLS       | High-maturation TLS | P-value | Low-maturation TLS | High-maturation TLS | P-value |      |
| Gender          | Male                           | 5                   | 20      | 0.35                     | 21                  | 11      | 0.93               | 8                   | 14      | 0.87 |
|                 | Female                         | 5                   | 10      |                          | 7                   | 2       |                    | 7                   | 11      |      |
| Smoking history | Smoker or                      | 7                   | 23      | 0.67                     | 22                  | 11      | 0.65               | 10                  | 16      | 0.86 |

|                                      |                          |   |    |      |    |   |      |    |    |      |
|--------------------------------------|--------------------------|---|----|------|----|---|------|----|----|------|
|                                      | ex-smoker                |   |    |      |    |   |      |    |    |      |
|                                      | Never smoker             | 3 | 7  |      | 6  | 2 |      | 5  | 9  |      |
| Histology                            | Squamous cell carcinomas | 4 | 17 | 0.63 | 18 | 7 | 0.10 | 5  | 9  | 0.17 |
|                                      | Adenocarcinoma           | 5 | 10 |      | 10 | 4 |      | 8  | 16 |      |
|                                      | Large cell carcinoma     | 1 | 3  | 1    | 0  | 2 | 1    | 2  | 0  |      |
| N stage                              | N0                       | 5 | 24 | 0.07 | 16 | 8 | 0.79 | 10 | 18 | 0.72 |
|                                      | N1-2                     | 5 | 6  |      | 12 | 5 |      | 5  | 7  |      |
| Neoadjuvant therapy number of cycles | 2                        | 4 | 12 | 0.65 | 18 | 7 | 0.52 | -  | -  |      |
|                                      | >2                       | 6 | 18 |      | 10 | 6 |      | -  | -  |      |
